# Supplementary material for: Supramolecular-interaction-mediated aggregation of anticarcinogens on triformyl cholic acid-functionalized Fe3O4 nanoparticles and their dual-targeting treatment for liver cancer
Source: Royal Society of Chemistry journal article supplement (doi:10.1039/d1nj00248a), 2021-01-01
Supplement: d1nj00248a1.pdf [file d1nj00248a1.pdf]

Electronic Supplementary Material (ESI) for Analyst.  
This journal is © The Royal Society of Chemistry 2021

## Supporting information

### Supramolecular interaction mediated aggregation of anticarcinogen on the triformyl cholic acid functionalized Fe<sub>3</sub>O<sub>4</sub> nanoparticles and its dual-targeting treatment for liver cancer

Tao Gong<sup>1</sup>, Rina Cheng<sup>1</sup>, Xiaoyu Wang<sup>1</sup>, Jing Li<sup>2</sup>, Wenting Liang<sup>2\*</sup>, Zhihong Wei<sup>2</sup>,  
Shaomin Shuang<sup>2\*</sup>, Yuyao Wang<sup>1</sup>, Rui Guo<sup>1\*</sup>

<sup>1</sup> Department of Biochemistry and Molecular Biology, Shanxi Medical University, Taiyuan  
030001, China; 1583415276@139.com (R.G.)

<sup>2</sup> Institute of Environmental Science, Department of Chemistry, Shanxi University, Taiyuan  
030006, China; liangwt@sxu.edu.cn (W.L.); smshuang@sxu.edu.cn (S. S.)

#### 1. Synthesis information

##### 1. 1 Synthesis of triformyl cholic acid

Triformyl cholic acid was prepared by previously reported method [27]. Briefly, cholic acid (8.34 g, 20 mmol) was dissolved in formic acid (40 mL, 0.81 mol), and the mixture was vigorously stirred at 55 °C for 6 h. After removing the excess formic acid under reduced pressure, the solid was crystallized from an ethanol-water mixture 250 mL (1:1.5). The resulting white precipitate was washed three times and dried under vacuum. <sup>1</sup>H NMR (CDCl<sub>3</sub>, 600 MHz). δ:

0.773 (s, 3H), 0.858 (d, 3H), 0.961 (s, 3H), 1.109-1.131(m, 3H), 1.323-2.396 (m), 4.732 (m, 1H), 5.088 (br s, 1H), 5.285(br s, 1H), 8.040 (s, 1H), 8.122 (s, 1H), 8.178 (s, 1H,) (Fig. S1), which consistent with the literature [27].

## 1.2 Synthesis of APTES-Fe<sub>3</sub>O<sub>4</sub> magnetic nanoparticles.

Superparamagnetic Fe<sub>3</sub>O<sub>4</sub> nanoparticles (MNPs) were obtained by chemical deposition method according to our previously reported work [28]. Typically, the FeCl<sub>3</sub>·6H<sub>2</sub>O and FeCl<sub>2</sub>·4H<sub>2</sub>O were added into the three-necked flask with mechanical stirring under N<sub>2</sub> protection and heated to 85°C. Then, ammonium hydroxide solution was added to the mixture dropwise until the pH raised to 10. The above mixture was kept reacting at 85°C for another 2 h. After cooling to room temperature, the obtained black sediments were magnetically separated and washed with ethanol and double-distilled water successively. Finally, the prepared MNPs were dried under vacuum at 40 °C for 12 h.

500 mg MNPs was ultrasonically dispersed in ethanol for 30 min. 240 µL APTES was added into the solution with rapid stirring under N<sub>2</sub> protection. After mechanically rabble for 8 h, the suspended material was separated with external magnetic field and washed by deionized water and ethanol for 5 times. The resulted powder dried under vacuum at room temperature.

## 2 Cellular uptake and in vitro anti-cancer activity evaluation

### 2.1 Cellular uptake

The fluorescence microscopy has been used to observe the cellular uptake of TCA-MNPs/DOX and TCA-MNPs/EPI by these four kinds of cells. The cells were seeded on a 24-well plate at 5×10<sup>3</sup> cells per well and incubated with culture medium at 37 °C for 24 h. Subsequently, the cells were incubated with TCA-MNPs/DOX and TCA-MNPs/EPI (10 µg/mL) for 1 h, 4 h and 8 h. After washing with PBS, the fluorescence image of cells was observed at 585–610 nm with excitation at 525 nm through fluorescence microscope.

The cells (5×10<sup>5</sup>) were seeded on a 6-well plate and incubated 24 hours sunder normal growing conditions. Then the cells were gently replaced the fresh medium containing TCA-MNPs/DOX (10 µg/mL) and incubated for another 24 hours. After washing with PBS, the cell was treated with trypsin solution and centrifuged at 1000 rpm for 3 min. Finally, the fluorescence expression of each group of cells was detected by flow cytometry.

## 2.2 *In vitro* anti-cancer activity study

The MTT assay has been used to determine the cytotoxicity of TCA-MNPs/DOX and TCA-MNPs/EPI towards cells (HepG2 cells, K150 cells, H1299 cells and 4T1 cells). The cells were seeded in 96-well microplates and grew in medium at a density of  $5 \times 10^3$  cells/well for 24 h at 37 °C. Subsequently, the medium was replaced with 100  $\mu$ L of fresh medium, and incubated with different concentrations (0, 10, 20 and 40  $\mu$ g/mL) of free TCA-MNPs, TCA-MNPs/DOX and TCA-MNPs/EPI for a further 24 h. Then discard the medium and incubated with MTT reagent for 4 h. The dimethylsulfoxide (DMSO) was added to each well to dissolve the formazan crystals. Finally, the absorbance of each well was measured at a wavelength of 490 nm using a microplate reader. The cell viability has been expressed by half-maximal inhibitory concentration ( $IC_{50}$ ). Repetitive studies were carried out five independent times in each experiment.

Further, the cytotoxicity of TCA-MNPs and TCA-MNPs/DOX for these four kinds of cells has been observed via the fluorescence microscopy. The cells were seeded on a 12-well plate at  $5 \times 10^3$  cells per well and incubated with culture medium at 37 °C for 24 h. Subsequently, the cells were incubated with TCA-MNPs and TCA-MNPs/DOX (10  $\mu$ g/mL) at 37 °C for 4 h. After washing with PBS and fixing the cells with 4% paraformaldehyde for 20 minutes, the cells were treated with One Step TUNEL-FITC apoptosis assay staining kits for 1 hour in the dark. Then, the fluorescence image of cells was observed through fluorescence microscope, while the DOX signal was obtained at 585-610 nm with excitation at 525 nm, and the TUNEL-FITC signal was detected at 505-545 nm with excitation at 488 nm.

## 3. Correlative calculation formulas

### 3.1 Formula of drug loading amount

$$Q_e = (M_0 - M_e) / M_n \quad (S1)$$

Where  $M_0$  is the feed mass of DOX/EPI in the initial solution, and  $M_e$  is the residual mass of DOX/EPI in the supernatant solution.  $M_n$  is the mass of the TCA-MNPs (mg).

### 3.2 Formula of drug release

The percentage of drug release was calculated via the following formula (Eq. (S2)):

$$\text{Drug released (\%)} = \frac{M_r}{M_l} \times 100 \% \quad (\text{S2})$$

Where  $M_r$  is the released amount of drug, and  $M_l$  is the loading amount of drug.

### 3.3 Formula oftumor volumes and tumor inhibition rate

Tumor volumes were calculated by the formula (Eq. (S3)):

$$\text{Tumor volumes} = 0.5 \times (\text{length}) \times (\text{width})^2 (\text{S3})$$

Tumor inhibition rate was calculated according to the following formula (Eq. (S4)):

$$\text{Tumor inhibition rate} = \frac{V_{\text{tumor of control group}} - V_{\text{tumor of treatment group}}}{V_{\text{tumor of control group}}} \times 100\% \quad (\text{S4})$$

### 3.4TheScherrer formula of MNP core sizescalculation by XRD:

The average MNP core sizes can be evaluated from the XRD results by Scherrer formula:

$$D = \frac{0.9\lambda}{B \cos \theta} \quad (\text{S5})$$

Where  $D$  is the average particle diameter, 0.94 is the Scherrer's constant,  $\lambda$  is the X-ray wavelength ( $\lambda=0.154$  nm),  $B$  (0.770) is the angular line width of half-maximum intensity and  $\theta$  (35.52) is the Bragg's angle in degree. Here, the (311) peak of the highest intensity was picked out to evaluate the particle diameter of the TCA-MNPs, and the  $D$  was calculated to be 10.2 nm which is similar to the results of TEM.

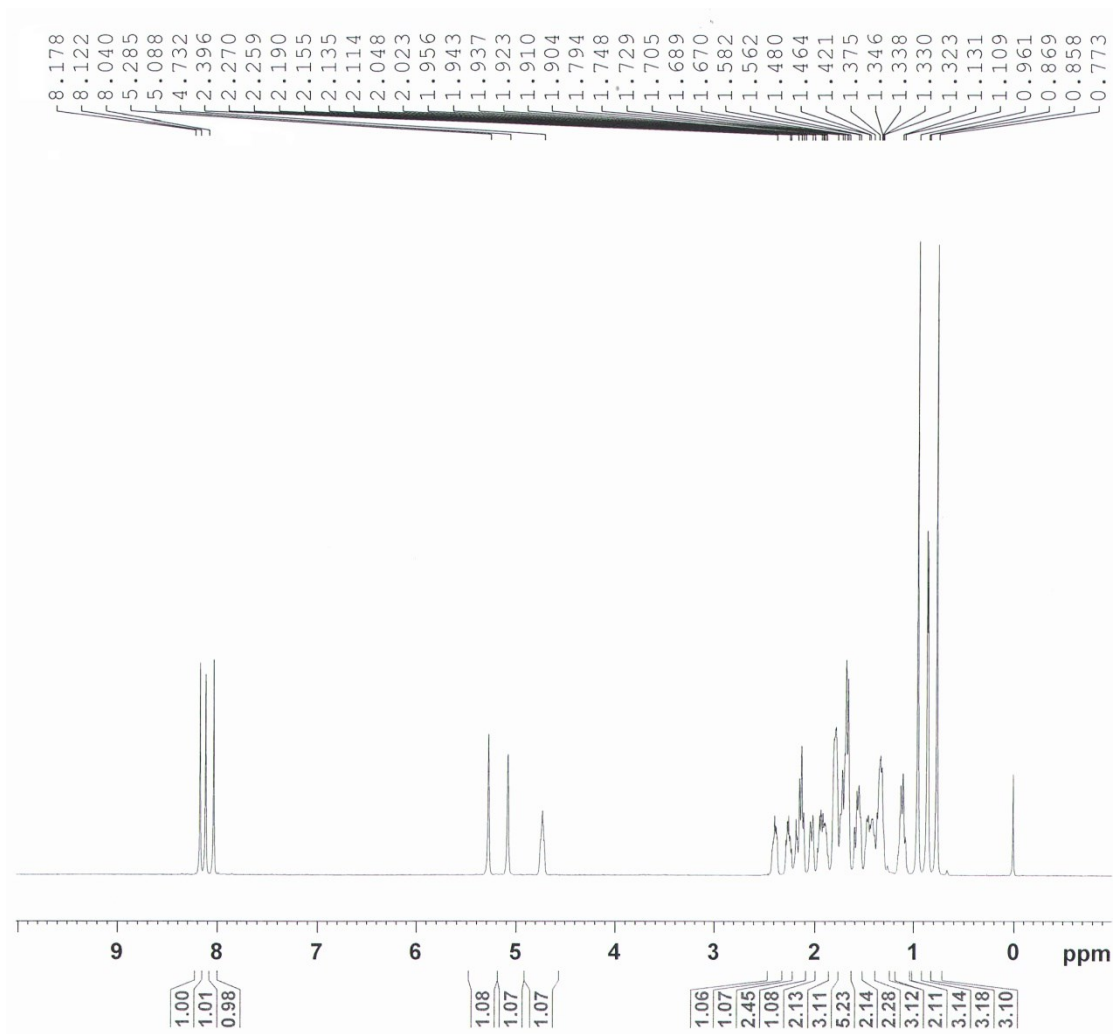

**Fig.S1.** <sup>1</sup>H NMR of TCA (600 MHz, CDCl<sub>3</sub>).

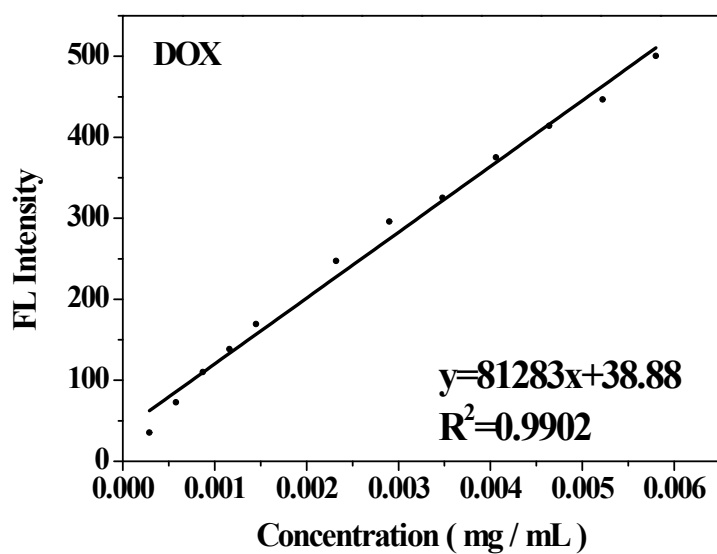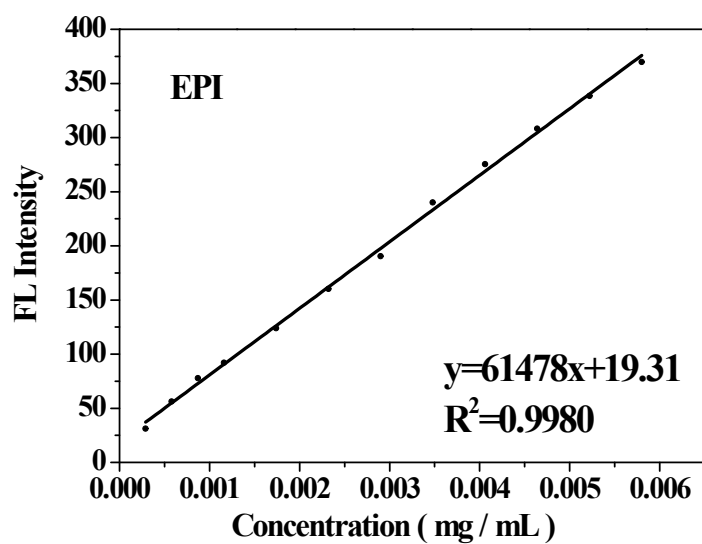

Fig.S2. Plot of calibration curves for DOX and EPI.

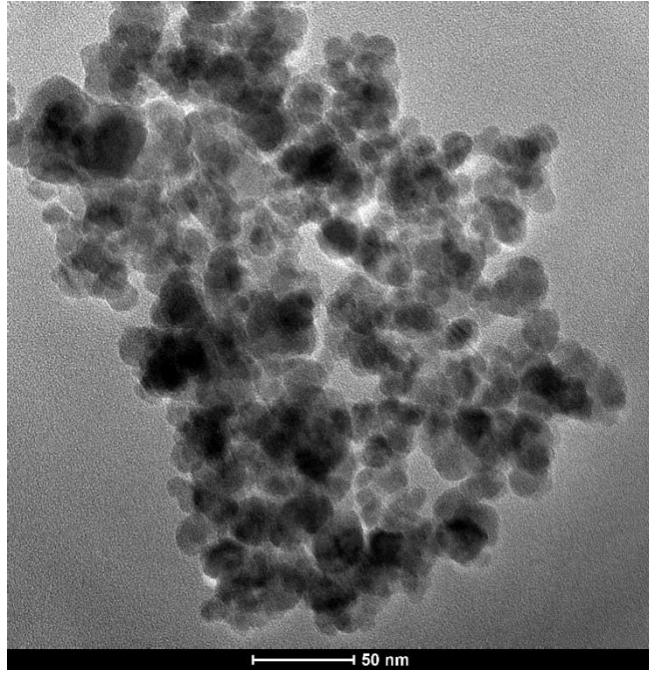

**Fig.S3.** TEM image of MMPs.

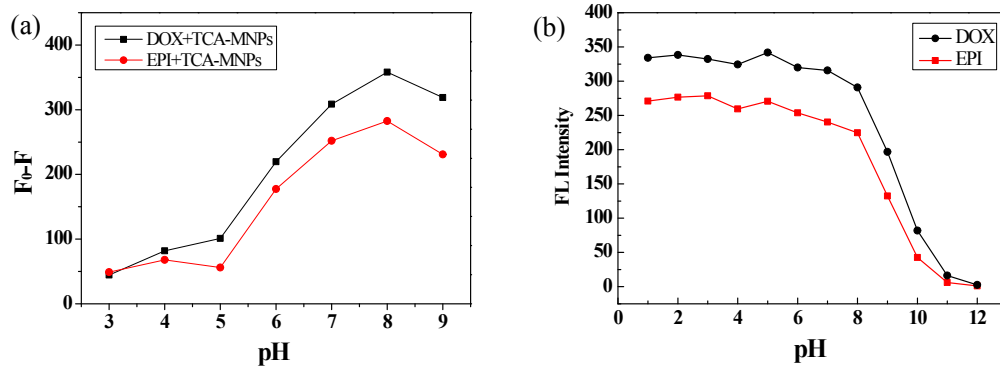

**Fig.S4.** (a) The influence of pH on absorption between TCA-MNPs and DOX, EPI at PB solution ( $c = 5.8 \times 10^{-3}$  mg/mL); (b) The pH effect on fluorescence intensity of DOX and EPI at PB solution ( $c = 5.8 \times 10^{-3}$  mg/mL).



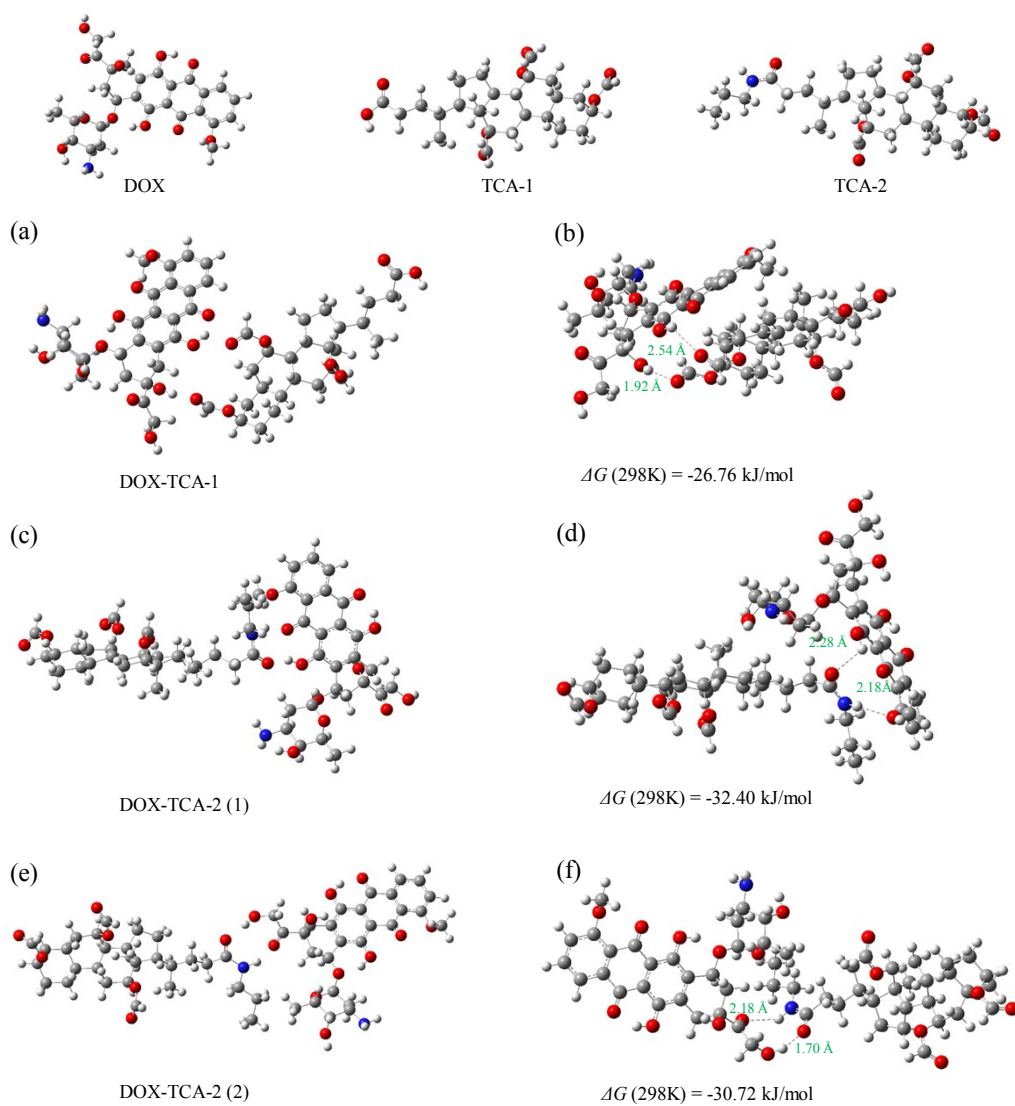

**Fig.S5.** The possible H-bonded structures of DOX-TCA complexes (a, c, e); the minimum energy structures and their Gibbs free energy ( $\Delta G$ ) (b, d, f). The dashed lines indicate the hydrogen bonding.

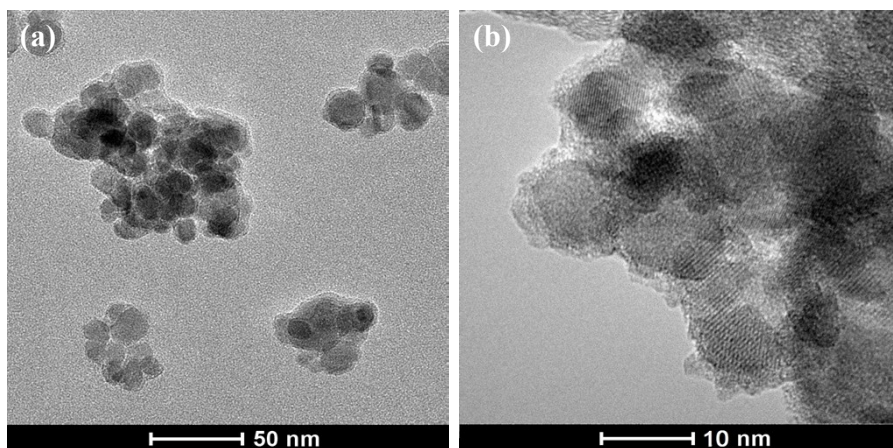

**Fig.S6.** TEM (a) and HRTEM (b) images of TCA-MMPs/DOX.

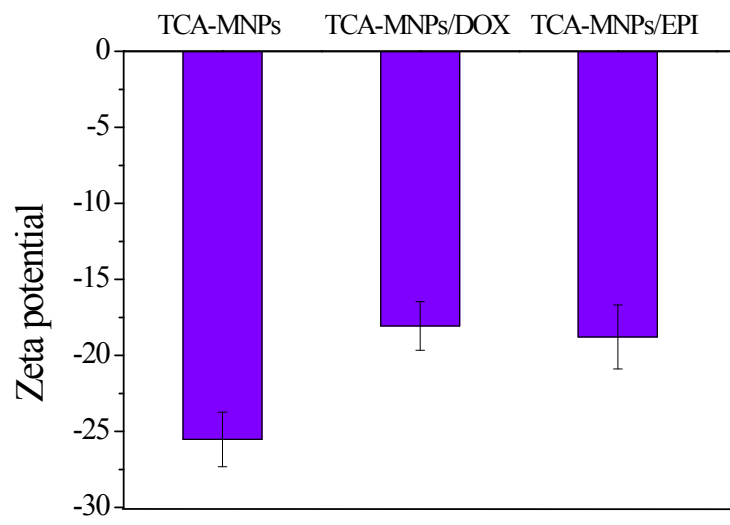

**Fig.S7.** Zeta potential values of TCA-MNPs, TCA-MNPs/DOX and TCA-MNPs/EPI at pH 7.0.

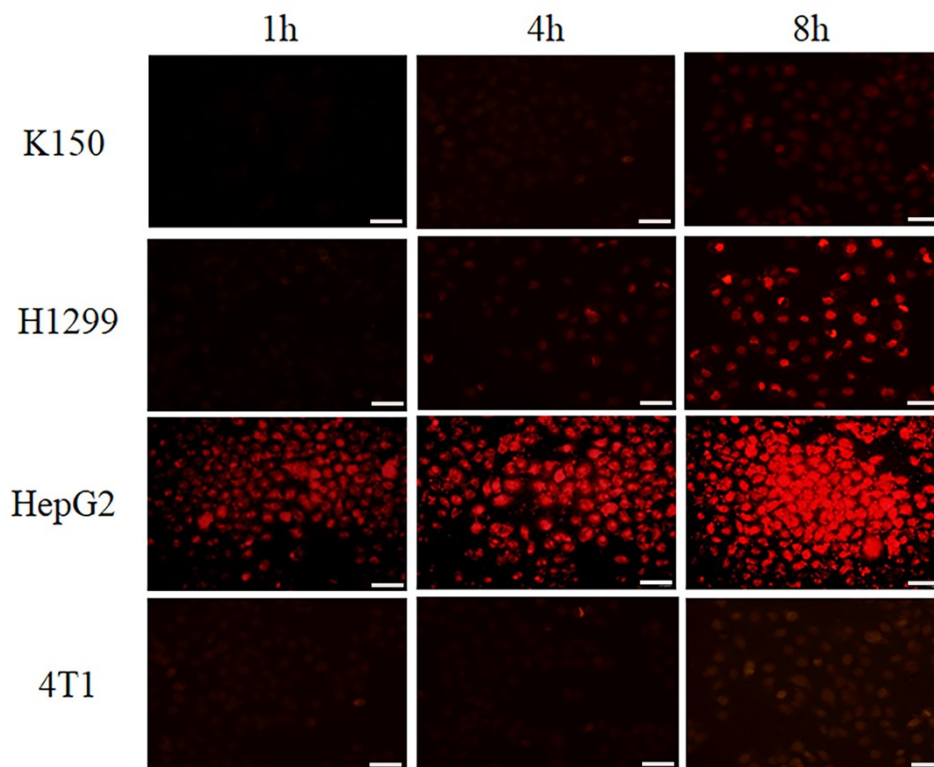

**Fig.S8.** Fluorescence microscope image of HepG2, K150, H1299, and 4T1 cells incubated with TCA-MNPs/EPI for 1-8 hours, Bar = 50  $\mu$ m.
